# Supplementary material
Source: PubMed Central journal article supplement (PMC7722158)
Supplement: NIHMS1615018-supplement-supp_info.pdf [file NIHMS1615018-supplement-supp_info.pdf]

Supplementary materials for:

Parasympathetic and sympathetic nervous systems interactively predict change in  
cognitive functioning in midlife adults

Erik L. Knight<sup>\*1,2</sup>, Ryan J. Giuliano<sup>3</sup>, Sean W. Shank<sup>4</sup>, Megan M. Clarke<sup>4</sup>, and David M.  
Almeida<sup>1,5</sup>

1. Center for Healthy Aging, Pennsylvania State University
2. Department of Biobehavioral Health, Pennsylvania State University
3. Department of Psychology, University of Manitoba
4. Department of Kinesiology, Pennsylvania State University
5. Department of Human Development and Family Studies, Pennsylvania State University

\*Correspondence:  
423 Biobehavioral Health  
Pennsylvania State University  
University Park, PA 16802  
elk24@psu.edu

Table S1: Association of resting baseline PNS activity with change in cognitive functioning

|                           | BTACT            |                 |                  | Episodic Memory  |                 |                  | Executive Functioning |                 |                  |
|---------------------------|------------------|-----------------|------------------|------------------|-----------------|------------------|-----------------------|-----------------|------------------|
|                           | <i>Estimates</i> | <i>CI</i>       | <i>p</i>         | <i>Estimates</i> | <i>CI</i>       | <i>p</i>         | <i>Estimates</i>      | <i>CI</i>       | <i>p</i>         |
| Intercept (M2)            | 1.959            | 1.420 – 2.498   | <b>&lt;0.001</b> | 0.827            | 0.251 – 1.403   | <b>0.005</b>     | 2.159                 | 1.631 – 2.687   | <b>&lt;0.001</b> |
| MIDUS Wave                | -0.185           | -0.224 – -0.146 | <b>&lt;0.001</b> | -0.117           | -0.179 – -0.056 | <b>&lt;0.001</b> | -0.326                | -0.363 – -0.289 | <b>&lt;0.001</b> |
| HF HRV (baseline)         | -0.053           | -0.094 – -0.012 | <b>0.012</b>     | -0.032           | -0.080 – 0.016  | 0.189            | -0.055                | -0.095 – -0.014 | <b>0.008</b>     |
| MIDUS Wave x HF HRV       | 0.030            | -0.001 – 0.061  | 0.057            | 0.027            | -0.021 – 0.076  | 0.273            | 0.035                 | 0.005 – 0.064   | <b>0.020</b>     |
| <i>Covariates</i>         |                  |                 |                  |                  |                 |                  |                       |                 |                  |
| EPI                       | -0.014           | -0.097 – 0.070  | 0.747            | 0.004            | -0.085 – 0.093  | 0.938            | -0.010                | -0.092 – 0.072  | 0.808            |
| Gender                    | 0.039            | -0.056 – 0.133  | 0.423            | 0.571            | 0.470 – 0.673   | <b>&lt;0.001</b> | -0.147                | -0.240 – -0.054 | <b>0.002</b>     |
| Age                       | -0.026           | -0.031 – -0.021 | <b>&lt;0.001</b> | -0.021           | -0.026 – -0.016 | <b>&lt;0.001</b> | -0.025                | -0.030 – -0.021 | <b>&lt;0.001</b> |
| Years between Waves       | -0.170           | -0.227 – -0.112 | <b>&lt;0.001</b> | -0.092           | -0.154 – -0.031 | <b>0.003</b>     | -0.177                | -0.233 – -0.121 | <b>&lt;0.001</b> |
| Circulatory               | -0.184           | -0.350 – -0.017 | <b>0.031</b>     | -0.200           | -0.378 – -0.023 | <b>0.027</b>     | -0.178                | -0.341 – -0.015 | <b>0.033</b>     |
| Heart Disease             | -0.082           | -0.260 – 0.097  | 0.369            | -0.040           | -0.230 – 0.150  | 0.682            | -0.070                | -0.244 – 0.104  | 0.431            |
| High BP                   | -0.123           | -0.238 – -0.007 | <b>0.037</b>     | 0.008            | -0.116 – 0.131  | 0.904            | -0.115                | -0.229 – -0.002 | <b>0.045</b>     |
| Heart Murmur              | 0.071            | -0.069 – 0.210  | 0.320            | -0.010           | -0.160 – 0.139  | 0.891            | 0.084                 | -0.053 – 0.221  | 0.229            |
| TIA/Stroke                | -0.095           | -0.372 – 0.182  | 0.503            | -0.243           | -0.533 – 0.048  | 0.102            | -0.124                | -0.391 – 0.143  | 0.363            |
| Emphysema/COPD            | -0.078           | -0.379 – 0.222  | 0.609            | 0.243            | -0.075 – 0.562  | 0.135            | -0.207                | -0.500 – 0.086  | 0.166            |
| Major Depressive Disorder | -0.028           | -0.145 – 0.089  | 0.641            | -0.091           | -0.216 – 0.034  | 0.155            | -0.049                | -0.164 – 0.066  | 0.404            |
| Medication                | -0.060           | -0.122 – 0.002  | 0.056            | -0.065           | -0.131 – 0.002  | 0.056            | -0.048                | -0.109 – 0.012  | 0.117            |
| <b>Random Effects</b>     |                  |                 |                  |                  |                 |                  |                       |                 |                  |
| $\sigma^2$                |                  | 0.16            |                  |                  | 0.43            |                  |                       | 0.16            |                  |
| $T_{00}$                  |                  | 0.39            |                  |                  | 0.33            |                  |                       | 0.38            |                  |

---

---

|                                                      | <b>BTACT</b>  | <b>Episodic Memory</b> | <b>Executive Functioning</b> |
|------------------------------------------------------|---------------|------------------------|------------------------------|
| ICC                                                  | 0.71          | 0.43                   | 0.71                         |
| N                                                    | 867           | 869                    | 869                          |
| Observations                                         | 1666          | 1733                   | 1738                         |
| Marginal R <sup>2</sup> / Conditional R <sup>2</sup> | 0.187 / 0.764 | 0.166 / 0.527          | 0.222 / 0.773                |

---

---

Table S2: Association of EPI concentration with change in cognitive functioning

|                           | BTACT            |                 |                  | Episodic Memory  |                 |                  | Executive Functioning |                 |                  |
|---------------------------|------------------|-----------------|------------------|------------------|-----------------|------------------|-----------------------|-----------------|------------------|
|                           | <i>Estimates</i> | <i>CI</i>       | <i>p</i>         | <i>Estimates</i> | <i>CI</i>       | <i>p</i>         | <i>Estimates</i>      | <i>CI</i>       | <i>p</i>         |
| Intercept (M2)            | 1.955            | 1.416 – 2.493   | <b>&lt;0.001</b> | 0.827            | 0.251 – 1.402   | <b>0.005</b>     | 2.159                 | 1.631 – 2.687   | <b>&lt;0.001</b> |
| Midus Wave                | -0.184           | -0.223 – -0.145 | <b>&lt;0.001</b> | -0.117           | -0.179 – -0.056 | <b>&lt;0.001</b> | -0.326                | -0.363 – -0.289 | <b>&lt;0.001</b> |
| EPI                       | -0.043           | -0.133 – 0.048  | 0.354            | 0.003            | -0.101 – 0.108  | 0.950            | -0.019                | -0.107 – 0.069  | 0.677            |
| MIDUS Wave x EPI          | 0.059            | -0.011 – 0.129  | 0.097            | 0.000            | -0.109 – 0.110  | 0.994            | 0.017                 | -0.049 – 0.083  | 0.611            |
| <i>Covariates</i>         |                  |                 |                  |                  |                 |                  |                       |                 |                  |
| HF HRV (baseline)         | -0.039           | -0.077 – -0.000 | <b>0.049</b>     | -0.018           | -0.059 – 0.023  | 0.380            | -0.037                | -0.075 – 0.000  | 0.053            |
| Age                       | -0.026           | -0.031 – -0.021 | <b>&lt;0.001</b> | -0.021           | -0.026 – -0.016 | <b>&lt;0.001</b> | -0.025                | -0.030 – -0.021 | <b>&lt;0.001</b> |
| Gender                    | 0.039            | -0.056 – 0.134  | 0.421            | 0.571            | 0.470 – 0.672   | <b>&lt;0.001</b> | -0.147                | -0.240 – -0.054 | <b>0.002</b>     |
| Years between Waves       | -0.169           | -0.227 – -0.112 | <b>&lt;0.001</b> | -0.092           | -0.154 – -0.031 | <b>0.003</b>     | -0.177                | -0.233 – -0.121 | <b>&lt;0.001</b> |
| Circulatory               | -0.186           | -0.353 – -0.020 | <b>0.028</b>     | -0.200           | -0.378 – -0.023 | <b>0.027</b>     | -0.178                | -0.341 – -0.015 | <b>0.033</b>     |
| Heart Disease             | -0.082           | -0.260 – 0.096  | 0.368            | -0.040           | -0.230 – 0.150  | 0.680            | -0.070                | -0.244 – 0.104  | 0.431            |
| High BP                   | -0.122           | -0.237 – -0.006 | <b>0.039</b>     | 0.008            | -0.116 – 0.131  | 0.904            | -0.115                | -0.229 – -0.002 | <b>0.045</b>     |
| Heart Murmur              | 0.072            | -0.068 – 0.211  | 0.313            | -0.010           | -0.159 – 0.139  | 0.891            | 0.084                 | -0.053 – 0.221  | 0.229            |
| TIA/Stroke                | -0.095           | -0.372 – 0.182  | 0.501            | -0.243           | -0.533 – 0.048  | 0.102            | -0.124                | -0.391 – 0.143  | 0.363            |
| Emphysema/COPD            | -0.077           | -0.377 – 0.223  | 0.615            | 0.243            | -0.075 – 0.562  | 0.134            | -0.207                | -0.500 – 0.086  | 0.166            |
| Major Depressive Disorder | -0.027           | -0.144 – 0.090  | 0.648            | -0.091           | -0.216 – 0.034  | 0.155            | -0.049                | -0.164 – 0.066  | 0.404            |
| Medication                | -0.061           | -0.122 – 0.001  | 0.055            | -0.065           | -0.131 – 0.002  | 0.056            | -0.048                | -0.109 – 0.012  | 0.117            |
| <b>Random Effects</b>     |                  |                 |                  |                  |                 |                  |                       |                 |                  |
| $\sigma^2$                |                  | 0.16            |                  |                  | 0.43            |                  |                       | 0.16            |                  |
| $T_{00}$                  |                  | 0.39            |                  |                  | 0.33            |                  |                       | 0.38            |                  |

---

---

|                                                      | <b>BTACT</b>  | <b>Episodic Memory</b> | <b>Executive Functioning</b> |
|------------------------------------------------------|---------------|------------------------|------------------------------|
| ICC                                                  | 0.71          | 0.43                   | 0.71                         |
| N                                                    | 867           | 869                    | 869                          |
| Observations                                         | 1666          | 1733                   | 1738                         |
| Marginal R <sup>2</sup> / Conditional R <sup>2</sup> | 0.187 / 0.763 | 0.165 / 0.527          | 0.221 / 0.772                |

---

---

Table S3: Association of HF HRV recovery with change in cognitive functioning

|                       | BTACT            |                 |                  | Episodic Memory  |                 |                  | Executive Functioning |                 |                  |
|-----------------------|------------------|-----------------|------------------|------------------|-----------------|------------------|-----------------------|-----------------|------------------|
|                       | <i>Estimates</i> | <i>CI</i>       | <i>p</i>         | <i>Estimates</i> | <i>CI</i>       | <i>p</i>         | <i>Estimates</i>      | <i>CI</i>       | <i>p</i>         |
| Intercept (M2)        | 1.960            | 1.416 – 2.503   | <b>&lt;0.001</b> | 0.793            | 0.216 – 1.369   | <b>0.007</b>     | 2.170                 | 1.635 – 2.705   | <b>&lt;0.001</b> |
| MIDUS Wave            | -0.184           | -0.223 – -0.145 | <b>&lt;0.001</b> | -0.119           | -0.182 – -0.057 | <b>&lt;0.001</b> | -0.326                | -0.364 – -0.289 | <b>&lt;0.001</b> |
| HF HRV (recovery)     | -0.073           | -0.154 – 0.009  | 0.082            | -0.072           | -0.166 – 0.023  | 0.137            | -0.030                | -0.110 – 0.051  | 0.470            |
| MIDUS Wave x HF HRV   | 0.071            | 0.007 – 0.135   | <b>0.030</b>     | 0.013            | -0.086 – 0.113  | 0.792            | 0.039                 | -0.021 – 0.099  | 0.204            |
| <i>Covariates</i>     |                  |                 |                  |                  |                 |                  |                       |                 |                  |
| EPI                   | -0.007           | -0.091 – 0.078  | 0.878            | 0.017            | -0.073 – 0.107  | 0.712            | -0.010                | -0.093 – 0.073  | 0.814            |
| Age                   | -0.025           | -0.029 – -0.020 | <b>&lt;0.001</b> | -0.020           | -0.025 – -0.015 | <b>&lt;0.001</b> | -0.024                | -0.028 – -0.019 | <b>&lt;0.001</b> |
| Gender                | 0.026            | -0.070 – 0.122  | 0.590            | 0.564            | 0.463 – 0.666   | <b>&lt;0.001</b> | -0.158                | -0.252 – -0.064 | <b>0.001</b>     |
| Years between Waves   | -0.171           | -0.228 – -0.113 | <b>&lt;0.001</b> | -0.090           | -0.151 – -0.029 | <b>0.004</b>     | -0.179                | -0.236 – -0.122 | <b>&lt;0.001</b> |
| Circulatory           | -0.198           | -0.365 – -0.032 | <b>0.020</b>     | -0.210           | -0.386 – -0.033 | <b>0.020</b>     | -0.187                | -0.351 – -0.024 | <b>0.025</b>     |
| Heart Disease         | -0.101           | -0.280 – 0.079  | 0.272            | -0.051           | -0.241 – 0.140  | 0.602            | -0.094                | -0.270 – 0.082  | 0.296            |
| High BP               | -0.130           | -0.247 – -0.014 | <b>0.029</b>     | 0.001            | -0.123 – 0.124  | 0.992            | -0.124                | -0.238 – -0.009 | <b>0.035</b>     |
| Heart Murmur          | 0.081            | -0.059 – 0.221  | 0.256            | -0.007           | -0.156 – 0.142  | 0.931            | 0.095                 | -0.043 – 0.233  | 0.177            |
| TIA/Stroke            | -0.095           | -0.373 – 0.182  | 0.502            | -0.204           | -0.498 – 0.091  | 0.175            | -0.132                | -0.405 – 0.142  | 0.345            |
| Emphysema/COPD        | -0.079           | -0.379 – 0.222  | 0.608            | 0.248            | -0.069 – 0.564  | 0.126            | -0.208                | -0.502 – 0.086  | 0.166            |
| Depression            | -0.023           | -0.141 – 0.095  | 0.698            | -0.080           | -0.205 – 0.045  | 0.210            | -0.044                | -0.160 – 0.072  | 0.456            |
| Medication            | -0.048           | -0.110 – 0.014  | 0.130            | -0.053           | -0.119 – 0.013  | 0.119            | -0.041                | -0.103 – 0.020  | 0.185            |
| <b>Random Effects</b> |                  |                 |                  |                  |                 |                  |                       |                 |                  |
| $\sigma^2$            |                  | 0.16            |                  |                  | 0.42            |                  |                       | 0.15            |                  |
| T <sub>00</sub>       |                  | 0.39            |                  |                  | 0.32            |                  |                       | 0.38            |                  |

---

---

|                                                      | <b>BTACT</b>  | <b>Episodic Memory</b> | <b>Executive Functioning</b> |
|------------------------------------------------------|---------------|------------------------|------------------------------|
| ICC                                                  | 0.71          | 0.43                   | 0.71                         |
| N                                                    | 843           | 844                    | 844                          |
| Observations                                         | 1622          | 1683                   | 1688                         |
| Marginal R <sup>2</sup> / Conditional R <sup>2</sup> | 0.181 / 0.764 | 0.162 / 0.523          | 0.215 / 0.774                |

---

---

Table S4: HF HRV recovery and EPI interactively predict change in cognitive functioning

|                           | BTACT            |                 |                  | Episodic Memory  |                 |                  | Executive Functioning |                 |                  |
|---------------------------|------------------|-----------------|------------------|------------------|-----------------|------------------|-----------------------|-----------------|------------------|
|                           | <i>Estimates</i> | <i>CI</i>       | <i>p</i>         | <i>Estimates</i> | <i>CI</i>       | <i>p</i>         | <i>Estimates</i>      | <i>CI</i>       | <i>p</i>         |
| Intercept (M2)            | 1.958            | 1.415 – 2.501   | <b>&lt;0.001</b> | 0.793            | 0.215 – 1.370   | <b>0.007</b>     | 2.169                 | 1.634 – 2.704   | <b>&lt;0.001</b> |
| MIDUS Wave                | -0.182           | -0.221 – -0.143 | <b>&lt;0.001</b> | -0.118           | -0.180 – -0.055 | <b>&lt;0.001</b> | -0.323                | -0.360 – -0.286 | <b>&lt;0.001</b> |
| HF HRV (recovery)         | -0.080           | -0.162 – 0.002  | 0.056            | -0.076           | -0.171 – 0.019  | 0.115            | -0.036                | -0.117 – 0.044  | 0.378            |
| EPI                       | -0.033           | -0.125 – 0.058  | 0.475            | 0.021            | -0.085 – 0.126  | 0.703            | -0.018                | -0.108 – 0.072  | 0.695            |
| HF HRV x EPI              | 0.150            | -0.011 – 0.311  | 0.067            | 0.088            | -0.099 – 0.275  | 0.357            | 0.137                 | -0.021 – 0.296  | 0.090            |
| Wave x EPI                | 0.053            | -0.017 – 0.123  | 0.135            | -0.007           | -0.117 – 0.104  | 0.903            | 0.016                 | -0.050 – 0.082  | 0.633            |
| Wave x HF HRV             | 0.075            | 0.011 – 0.139   | <b>0.021</b>     | 0.021            | -0.079 – 0.121  | 0.679            | 0.051                 | -0.009 – 0.111  | 0.095            |
| Wave x HF HRV x EPI       | -0.176           | -0.305 – -0.048 | <b>0.007</b>     | -0.149           | -0.347 – 0.049  | 0.141            | -0.248                | -0.367 – -0.130 | <b>&lt;0.001</b> |
| <i>Covariates</i>         |                  |                 |                  |                  |                 |                  |                       |                 |                  |
| Age                       | -0.025           | -0.029 – -0.020 | <b>&lt;0.001</b> | -0.020           | -0.025 – -0.015 | <b>&lt;0.001</b> | -0.024                | -0.028 – -0.019 | <b>&lt;0.001</b> |
| Gender                    | 0.028            | -0.068 – 0.124  | 0.564            | 0.565            | 0.463 – 0.666   | <b>&lt;0.001</b> | -0.158                | -0.252 – -0.063 | <b>0.001</b>     |
| Years between Waves       | -0.171           | -0.228 – -0.113 | <b>&lt;0.001</b> | -0.090           | -0.152 – -0.029 | <b>0.004</b>     | -0.179                | -0.236 – -0.122 | <b>&lt;0.001</b> |
| Circulatory               | -0.202           | -0.368 – -0.035 | <b>0.018</b>     | -0.210           | -0.387 – -0.034 | <b>0.020</b>     | -0.188                | -0.352 – -0.024 | <b>0.025</b>     |
| Heart Disease             | -0.099           | -0.278 – 0.081  | 0.281            | -0.051           | -0.241 – 0.140  | 0.603            | -0.094                | -0.270 – 0.082  | 0.296            |
| High BP                   | -0.129           | -0.246 – -0.013 | <b>0.030</b>     | 0.001            | -0.123 – 0.124  | 0.991            | -0.124                | -0.238 – -0.009 | <b>0.035</b>     |
| Heart Murmur              | 0.083            | -0.057 – 0.223  | 0.247            | -0.007           | -0.156 – 0.142  | 0.932            | 0.095                 | -0.043 – 0.233  | 0.177            |
| TIA/Stroke                | -0.106           | -0.384 – 0.172  | 0.456            | -0.206           | -0.501 – 0.090  | 0.172            | -0.134                | -0.408 – 0.141  | 0.340            |
| Emphysema/COPD            | -0.080           | -0.380 – 0.221  | 0.602            | 0.248            | -0.069 – 0.565  | 0.125            | -0.207                | -0.502 – 0.087  | 0.168            |
| Major Depressive Disorder | -0.021           | -0.139 – 0.097  | 0.725            | -0.080           | -0.205 – 0.046  | 0.212            | -0.044                | -0.160 – 0.072  | 0.460            |



|                                                      | BTACT            |                |          | Episodic Memory  |                |          | Executive Functioning |                |          |
|------------------------------------------------------|------------------|----------------|----------|------------------|----------------|----------|-----------------------|----------------|----------|
|                                                      | <i>Estimates</i> | <i>CI</i>      | <i>p</i> | <i>Estimates</i> | <i>CI</i>      | <i>p</i> | <i>Estimates</i>      | <i>CI</i>      | <i>p</i> |
| Medication                                           | -0.051           | -0.113 – 0.012 | 0.111    | -0.053           | -0.119 – 0.013 | 0.117    | -0.042                | -0.103 – 0.020 | 0.182    |
| <b>Random Effects</b>                                |                  |                |          |                  |                |          |                       |                |          |
| $\sigma^2$                                           |                  | 0.16           |          |                  | 0.42           |          |                       | 0.15           |          |
| $T_{00}$                                             |                  | 0.39           |          |                  | 0.32           |          |                       | 0.38           |          |
| ICC                                                  |                  | 0.71           |          |                  | 0.43           |          |                       | 0.72           |          |
| N                                                    |                  | 843            |          |                  | 844            |          |                       | 844            |          |
| Observations                                         |                  | 1622           |          |                  | 1683           |          |                       | 1688           |          |
| Marginal R <sup>2</sup> / Conditional R <sup>2</sup> |                  | 0.184 / 0.766  |          |                  | 0.163 / 0.523  |          |                       | 0.217 / 0.778  |          |

Table S5: HF HRV reactivity and EPI interactively predict change in cognitive functioning

|                           | BTACT            |                 |                  | Episodic Memory  |                 |                  | Executive Functioning |                 |                  |
|---------------------------|------------------|-----------------|------------------|------------------|-----------------|------------------|-----------------------|-----------------|------------------|
|                           | <i>Estimates</i> | <i>CI</i>       | <i>p</i>         | <i>Estimates</i> | <i>CI</i>       | <i>p</i>         | <i>Estimates</i>      | <i>CI</i>       | <i>p</i>         |
| Intercept (M2)            | 1.948            | 1.405 – 2.491   | <b>&lt;0.001</b> | 0.797            | 0.220 – 1.375   | <b>0.007</b>     | 2.160                 | 1.626 – 2.695   | <b>&lt;0.001</b> |
| MIDUS Wave                | -0.185           | -0.223 – -0.146 | <b>&lt;0.001</b> | -0.114           | -0.176 – -0.053 | <b>&lt;0.001</b> | -0.327                | -0.364 – -0.290 | <b>&lt;0.001</b> |
| HF HRV (reactivity)       | 0.065            | -0.022 – 0.153  | 0.143            | 0.044            | -0.058 – 0.145  | 0.399            | 0.034                 | -0.053 – 0.120  | 0.445            |
| EPI                       | -0.028           | -0.119 – 0.063  | 0.549            | 0.019            | -0.087 – 0.124  | 0.728            | -0.009                | -0.099 – 0.080  | 0.837            |
| HF HRV x EPI              | -0.202           | -0.370 – -0.034 | <b>0.018</b>     | -0.131           | -0.326 – 0.064  | 0.187            | -0.200                | -0.365 – -0.035 | <b>0.018</b>     |
| Wave x EPI                | 0.050            | -0.019 – 0.120  | 0.152            | -0.008           | -0.118 – 0.102  | 0.883            | 0.012                 | -0.053 – 0.078  | 0.714            |
| Wave x HF HRV             | -0.051           | -0.119 – 0.017  | 0.142            | 0.027            | -0.079 – 0.134  | 0.615            | -0.038                | -0.102 – 0.026  | 0.241            |
| Wave x HF HRV x EPI       | 0.192            | 0.054 – 0.330   | <b>0.006</b>     | 0.234            | 0.029 – 0.439   | <b>0.025</b>     | 0.263                 | 0.140 – 0.385   | <b>&lt;0.001</b> |
| <i>Covariates</i>         |                  |                 |                  |                  |                 |                  |                       |                 |                  |
| Age                       | -0.025           | -0.030 – -0.020 | <b>&lt;0.001</b> | -0.021           | -0.026 – -0.016 | <b>&lt;0.001</b> | -0.024                | -0.029 – -0.020 | <b>&lt;0.001</b> |
| Gender                    | 0.035            | -0.061 – 0.130  | 0.480            | 0.570            | 0.469 – 0.672   | <b>&lt;0.001</b> | -0.153                | -0.247 – -0.058 | <b>0.002</b>     |
| Years between Waves       | -0.169           | -0.227 – -0.111 | <b>&lt;0.001</b> | -0.091           | -0.152 – -0.029 | <b>0.004</b>     | -0.177                | -0.234 – -0.121 | <b>&lt;0.001</b> |
| Circulatory               | -0.200           | -0.367 – -0.033 | <b>0.019</b>     | -0.212           | -0.389 – -0.035 | <b>0.019</b>     | -0.189                | -0.353 – -0.024 | <b>0.024</b>     |
| Heart Disease             | -0.101           | -0.280 – 0.078  | 0.267            | -0.057           | -0.247 – 0.133  | 0.554            | -0.088                | -0.263 – 0.088  | 0.329            |
| High BP                   | -0.124           | -0.240 – -0.007 | <b>0.038</b>     | 0.007            | -0.117 – 0.131  | 0.913            | -0.119                | -0.234 – -0.004 | <b>0.042</b>     |
| Heart Murmur              | 0.074            | -0.066 – 0.214  | 0.299            | -0.009           | -0.158 – 0.140  | 0.909            | 0.085                 | -0.053 – 0.222  | 0.229            |
| TIA/Stroke                | -0.093           | -0.376 – 0.191  | 0.522            | -0.180           | -0.481 – 0.122  | 0.242            | -0.125                | -0.404 – 0.155  | 0.382            |
| Emphysema/COPD            | -0.088           | -0.389 – 0.214  | 0.569            | 0.242            | -0.076 – 0.561  | 0.136            | -0.211                | -0.507 – 0.085  | 0.162            |
| Major Depressive Disorder | -0.025           | -0.143 – 0.094  | 0.685            | -0.082           | -0.208 – 0.044  | 0.202            | -0.046                | -0.163 – 0.070  | 0.436            |

|                                                      | BTACT            |                |          | Episodic Memory  |                |          | Executive Functioning |                |          |
|------------------------------------------------------|------------------|----------------|----------|------------------|----------------|----------|-----------------------|----------------|----------|
|                                                      | <i>Estimates</i> | <i>CI</i>      | <i>p</i> | <i>Estimates</i> | <i>CI</i>      | <i>p</i> | <i>Estimates</i>      | <i>CI</i>      | <i>p</i> |
| Medication                                           | -0.053           | -0.116 – 0.009 | 0.094    | -0.055           | -0.122 – 0.011 | 0.104    | -0.042                | -0.104 – 0.019 | 0.176    |
| <b>Random Effects</b>                                |                  |                |          |                  |                |          |                       |                |          |
| $\sigma^2$                                           |                  | 0.16           |          |                  | 0.42           |          |                       | 0.15           |          |
| $T_{00}$                                             |                  | 0.39           |          |                  | 0.33           |          |                       | 0.39           |          |
| ICC                                                  |                  | 0.72           |          |                  | 0.44           |          |                       | 0.72           |          |
| N                                                    |                  | 854            |          |                  | 855            |          |                       | 855            |          |
| Observations                                         |                  | 1642           |          |                  | 1705           |          |                       | 1710           |          |
| Marginal R <sup>2</sup> / Conditional R <sup>2</sup> |                  | 0.186 / 0.770  |          |                  | 0.164 / 0.528  |          |                       | 0.219 / 0.781  |          |

Table S6. Follow-up analyses of PNS x SNS on change in BTACT scores using quadratic index of PNS responsiveness

|                                                      | BTACT            |                 |                  |
|------------------------------------------------------|------------------|-----------------|------------------|
|                                                      | <i>Estimates</i> | <i>CI</i>       | <i>p</i>         |
| Intercept (M2)                                       | 1.990            | 1.451 – 2.529   | <b>&lt;0.001</b> |
| MIDUS Wave                                           | -0.183           | -0.222 – -0.144 | <b>&lt;0.001</b> |
| HF HRV (quadratic index)                             | -0.052           | -0.109 – 0.005  | 0.072            |
| EPI                                                  | -0.037           | -0.127 – 0.054  | 0.427            |
| HF HRV x EPI*                                        | 0.119            | 0.005 – 0.233   | <b>0.041</b>     |
| Wave x HF HRV                                        | 0.044            | 0.000 – 0.089   | <b>0.049</b>     |
| Wave x EPI                                           | 0.054            | -0.016 – 0.123  | 0.129            |
| Wave x HF HRV x EPI                                  | -0.128           | -0.218 – -0.037 | <b>0.006</b>     |
| <i>Covariates</i>                                    |                  |                 |                  |
| Age                                                  | -0.025           | -0.030 – -0.021 | <b>&lt;0.001</b> |
| Gender                                               | 0.036            | -0.059 – 0.131  | 0.456            |
| Years between Waves                                  | -0.174           | -0.231 – -0.116 | <b>&lt;0.001</b> |
| Circulatory                                          | -0.200           | -0.367 – -0.034 | <b>0.019</b>     |
| Heart Disease                                        | -0.095           | -0.274 – 0.083  | 0.296            |
| High BP                                              | -0.125           | -0.241 – -0.009 | <b>0.034</b>     |
| Heart Murmur                                         | 0.074            | -0.066 – 0.214  | 0.298            |
| TIA/Stroke                                           | -0.093           | -0.371 – 0.185  | 0.510            |
| Emphysema/COPD                                       | -0.070           | -0.372 – 0.231  | 0.647            |
| Major Depressive Disorder                            | -0.023           | -0.141 – 0.095  | 0.699            |
| Medication                                           | -0.057           | -0.119 – 0.005  | 0.073            |
| <b>Random Effects</b>                                |                  |                 |                  |
| $\sigma^2$                                           |                  | 0.16            |                  |
| $T_{00}$                                             |                  | 0.39            |                  |
| ICC                                                  |                  | 0.71            |                  |
| N                                                    |                  | 865             |                  |
| Observations                                         |                  | 1662            |                  |
| Marginal R <sup>2</sup> / Conditional R <sup>2</sup> |                  | 0.188 / 0.766   |                  |

\*Although significant in the MLM, these effects are not evident in cross-sectional models focused on MIDUS 2.

Table S7: Age weakly and inconsistently moderates the interaction between HRV and EPI on changes in cognitive functioning (BTACT scores)

|                           | Baseline HRV     |                 |                  | HRV Reactivity   |                 |                  | HRV Recovery     |                 |                  |
|---------------------------|------------------|-----------------|------------------|------------------|-----------------|------------------|------------------|-----------------|------------------|
|                           | <i>Estimates</i> | <i>CI</i>       | <i>p</i>         | <i>Estimates</i> | <i>CI</i>       | <i>p</i>         | <i>Estimates</i> | <i>CI</i>       | <i>p</i>         |
| Intercept                 | 1.875            | 1.336 – 2.414   | <b>&lt;0.001</b> | 1.911            | 1.367 – 2.455   | <b>&lt;0.001</b> | 1.941            | 1.397 – 2.484   | <b>&lt;0.001</b> |
| MIDUS Wave                | -0.207           | -0.250 – -0.164 | <b>&lt;0.001</b> | -0.197           | -0.238 – -0.156 | <b>&lt;0.001</b> | -0.194           | -0.236 – -0.153 | <b>&lt;0.001</b> |
| HF HRV                    | -0.066           | -0.110 – -0.021 | <b>0.004</b>     | 0.088            | -0.007 – 0.183  | 0.069            | -0.105           | -0.196 – -0.015 | <b>0.023</b>     |
| EPI                       | -0.032           | -0.132 – 0.069  | 0.537            | 0.010            | -0.090 – 0.109  | 0.848            | 0.002            | -0.098 – 0.102  | 0.969            |
| Age                       | -0.027           | -0.032 – -0.022 | <b>&lt;0.001</b> | -0.025           | -0.030 – -0.020 | <b>&lt;0.001</b> | -0.025           | -0.030 – -0.020 | <b>&lt;0.001</b> |
| Wave x HF HRV             | 0.041            | 0.007 – 0.075   | <b>0.019</b>     | -0.048           | -0.121 – 0.024  | 0.193            | 0.070            | 0.000 – 0.140   | <b>0.049</b>     |
| Wave x EPI                | 0.042            | -0.036 – 0.120  | 0.292            | 0.019            | -0.056 – 0.095  | 0.616            | 0.026            | -0.050 – 0.102  | 0.508            |
| Wave x Age                | 0.002            | -0.002 – 0.006  | 0.244            | 0.001            | -0.002 – 0.005  | 0.441            | 0.001            | -0.002 – 0.005  | 0.470            |
| HF HRV x EPI              | 0.085            | -0.000 – 0.169  | 0.051            | -0.226           | -0.429 – -0.023 | <b>0.029</b>     | 0.144            | -0.046 – 0.334  | 0.138            |
| HF HRV x Age              | 0.005            | 0.001 – 0.009   | <b>0.010</b>     | -0.008           | -0.016 – -0.000 | <b>0.045</b>     | 0.007            | -0.001 – 0.015  | 0.071            |
| EPI x Age                 | -0.007           | -0.015 – 0.002  | 0.109            | -0.009           | -0.018 – -0.000 | <b>0.048</b>     | -0.008           | -0.016 – 0.001  | 0.085            |
| Wave x HF HRV x EPI       | -0.047           | -0.114 – 0.020  | 0.165            | 0.238            | 0.085 – 0.392   | <b>0.002</b>     | -0.225           | -0.369 – -0.081 | <b>0.002</b>     |
| Wave x HF HRV x Age       | -0.002           | -0.005 – 0.001  | 0.225            | 0.001            | -0.006 – 0.007  | 0.818            | -0.001           | -0.008 – 0.005  | 0.652            |
| Wave x EPI x Age          | 0.006            | -0.001 – 0.013  | 0.086            | 0.007            | -0.000 – 0.013  | 0.056            | 0.006            | -0.001 – 0.013  | 0.097            |
| HF HRV x EPI x Age        | -0.010           | -0.016 – -0.003 | <b>0.002</b>     | 0.009            | -0.006 – 0.023  | 0.234            | -0.006           | -0.020 – 0.009  | 0.437            |
| Wave x HF HRV x EPI x Age | 0.004            | -0.001 – 0.009  | 0.102            | -0.011           | -0.023 – 0.002  | 0.103            | 0.011            | -0.001 – 0.023  | 0.062            |
| <i>Covariates</i>         |                  |                 |                  |                  |                 |                  |                  |                 |                  |
| Gender                    | 0.042            | -0.052 – 0.137  | 0.381            | 0.042            | -0.053 – 0.138  | 0.385            | 0.037            | -0.059 – 0.134  | 0.445            |

|                                                      | Baseline HRV     |                 |                  | HRV Reactivity   |                 |                  | HRV Recovery     |                 |                  |
|------------------------------------------------------|------------------|-----------------|------------------|------------------|-----------------|------------------|------------------|-----------------|------------------|
|                                                      | <i>Estimates</i> | <i>CI</i>       | <i>p</i>         | <i>Estimates</i> | <i>CI</i>       | <i>p</i>         | <i>Estimates</i> | <i>CI</i>       | <i>p</i>         |
| Years between Waves                                  | -0.157           | -0.215 – -0.100 | <b>&lt;0.001</b> | -0.164           | -0.222 – -0.106 | <b>&lt;0.001</b> | -0.168           | -0.226 – -0.110 | <b>&lt;0.001</b> |
| Circulatory                                          | -0.181           | -0.347 – -0.015 | <b>0.033</b>     | -0.194           | -0.361 – -0.027 | <b>0.023</b>     | -0.196           | -0.362 – -0.029 | <b>0.021</b>     |
| Heart Disease                                        | -0.091           | -0.268 – 0.087  | 0.317            | -0.095           | -0.274 – 0.084  | 0.300            | -0.097           | -0.276 – 0.082  | 0.289            |
| High BP                                              | -0.131           | -0.246 – -0.016 | <b>0.026</b>     | -0.123           | -0.239 – -0.006 | <b>0.039</b>     | -0.130           | -0.246 – -0.013 | <b>0.030</b>     |
| Heart Murmur                                         | 0.080            | -0.059 – 0.219  | 0.260            | 0.071            | -0.070 – 0.211  | 0.324            | 0.085            | -0.056 – 0.225  | 0.239            |
| TIA/Stroke                                           | -0.090           | -0.367 – 0.186  | 0.522            | -0.073           | -0.357 – 0.212  | 0.616            | -0.091           | -0.371 – 0.188  | 0.521            |
| Emphysema/COPD                                       | -0.077           | -0.377 – 0.222  | 0.614            | -0.092           | -0.394 – 0.210  | 0.549            | -0.083           | -0.385 – 0.219  | 0.589            |
| Major Depressive Disorder                            | -0.038           | -0.156 – 0.079  | 0.520            | -0.031           | -0.149 – 0.088  | 0.611            | -0.029           | -0.147 – 0.090  | 0.634            |
| Medication                                           | -0.059           | -0.120 – 0.003  | 0.062            | -0.049           | -0.111 – 0.014  | 0.126            | -0.047           | -0.110 – 0.015  | 0.137            |
| <b>Random Effects</b>                                |                  |                 |                  |                  |                 |                  |                  |                 |                  |
| $\sigma^2$                                           |                  | 0.16            |                  |                  | 0.15            |                  |                  | 0.16            |                  |
| $T_{00}$                                             |                  | 0.38            |                  |                  | 0.39            |                  |                  | 0.39            |                  |
| ICC                                                  |                  | 0.71            |                  |                  | 0.72            |                  |                  | 0.72            |                  |
| N                                                    |                  | 867             |                  |                  | 854             |                  |                  | 843             |                  |
| Observations                                         |                  | 1666            |                  |                  | 1642            |                  |                  | 1622            |                  |
| Marginal R <sup>2</sup> / Conditional R <sup>2</sup> |                  | 0.196 / 0.766   |                  |                  | 0.190 / 0.772   |                  |                  | 0.187 / 0.768   |                  |

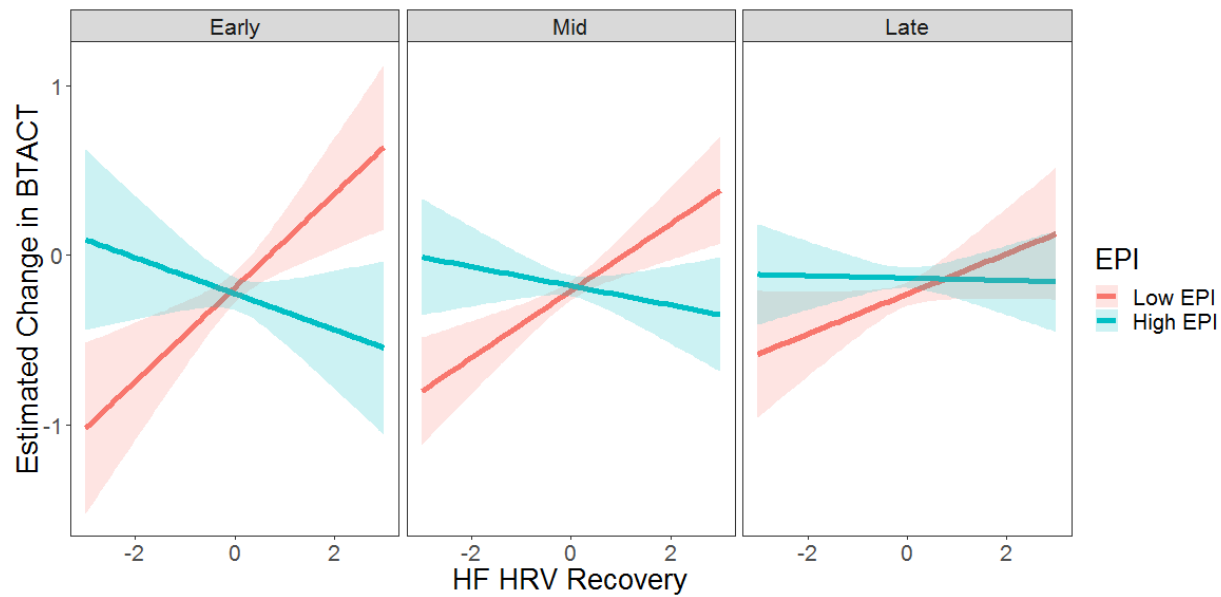

**Figure S1.** Estimated change in BTACT scores (MIDUS 3 – MIDUS 2) at  $\pm 1$ SD EPI concentration for a 40 (early), 50 (mid), and 60 (late) year old at MIDUS 2 (and thus, approximately 50, 60, and year old at MIDUS 3) across a range of HF HRV recovery values. Larger positive HF HRV recovery values indicate a stronger recovery following a cognitive challenge. Point estimates of change in BTACT represent the slope connecting MIDUS 3 and MIDUS 2 and were derived from the multilevel model.

Table S8: Norepinephrine moderates HRV association with change in cognitive functioning (BTACT scores)

|                     | Baseline HRV     |                 |                  | HRV Reactivity   |                 |                  | HRV Recovery     |                 |                  |
|---------------------|------------------|-----------------|------------------|------------------|-----------------|------------------|------------------|-----------------|------------------|
|                     | <i>Estimates</i> | <i>CI</i>       | <i>p</i>         | <i>Estimates</i> | <i>CI</i>       | <i>p</i>         | <i>Estimates</i> | <i>CI</i>       | <i>p</i>         |
| Intercept           | 1.956            | 1.418 – 2.494   | <b>&lt;0.001</b> | 1.943            | 1.401 – 2.484   | <b>&lt;0.001</b> | 1.956            | 1.415 – 2.497   | <b>&lt;0.001</b> |
| MIDUS Wave          | -0.185           | -0.224 – -0.146 | <b>&lt;0.001</b> | -0.182           | -0.221 – -0.143 | <b>&lt;0.001</b> | -0.180           | -0.220 – -0.141 | <b>&lt;0.001</b> |
| HF HRV              | -0.055           | -0.096 – -0.014 | <b>0.009</b>     | 0.073            | -0.016 – 0.161  | 0.108            | -0.083           | -0.165 – -0.000 | <b>0.049</b>     |
| Norepinephrine (NE) | -0.075           | -0.199 – 0.048  | 0.232            | -0.052           | -0.178 – 0.074  | 0.419            | -0.048           | -0.174 – 0.078  | 0.454            |
| Wave x NE           | 0.048            | -0.042 – 0.138  | 0.295            | 0.020            | -0.069 – 0.110  | 0.660            | 0.017            | -0.073 – 0.107  | 0.710            |
| Wave x HF HRV       | 0.032            | 0.001 – 0.063   | <b>0.045</b>     | -0.058           | -0.126 – 0.011  | 0.100            | 0.077            | 0.013 – 0.141   | <b>0.019</b>     |
| HF HRV x NE         | 0.029            | -0.060 – 0.117  | 0.526            | -0.254           | -0.457 – -0.051 | <b>0.014</b>     | 0.222            | 0.032 – 0.413   | <b>0.022</b>     |
| Wave x HF HRV x NE  | -0.005           | -0.074 – 0.063  | 0.877            | 0.161            | 0.001 – 0.321   | <b>0.048</b>     | -0.158           | -0.308 – -0.008 | <b>0.039</b>     |
| <i>Covariates</i>   |                  |                 |                  |                  |                 |                  |                  |                 |                  |
| Age                 | -0.026           | -0.031 – -0.021 | <b>&lt;0.001</b> | -0.025           | -0.030 – -0.020 | <b>&lt;0.001</b> | -0.024           | -0.029 – -0.020 | <b>&lt;0.001</b> |
| Gender              | 0.049            | -0.048 – 0.147  | 0.322            | 0.042            | -0.057 – 0.141  | 0.405            | 0.037            | -0.062 – 0.136  | 0.469            |
| Years between Waves | -0.170           | -0.228 – -0.113 | <b>&lt;0.001</b> | -0.170           | -0.228 – -0.112 | <b>&lt;0.001</b> | -0.171           | -0.229 – -0.113 | <b>&lt;0.001</b> |
| Circulatory         | -0.183           | -0.350 – -0.016 | <b>0.031</b>     | -0.204           | -0.371 – -0.038 | <b>0.016</b>     | -0.208           | -0.374 – -0.041 | <b>0.015</b>     |
| Heart Disease       | -0.084           | -0.262 – 0.095  | 0.358            | -0.102           | -0.281 – 0.076  | 0.262            | -0.099           | -0.279 – 0.080  | 0.277            |
| High BP             | -0.118           | -0.234 – -0.002 | <b>0.046</b>     | -0.121           | -0.238 – -0.004 | <b>0.043</b>     | -0.128           | -0.245 – -0.011 | <b>0.032</b>     |
| Heart Murmur        | 0.069            | -0.071 – 0.208  | 0.333            | 0.071            | -0.069 – 0.211  | 0.320            | 0.078            | -0.062 – 0.218  | 0.274            |
| TIA/Stroke          | -0.093           | -0.369 – 0.183  | 0.509            | -0.090           | -0.373 – 0.192  | 0.531            | -0.106           | -0.382 – 0.171  | 0.454            |
| Emphysema/COPD      | -0.068           | -0.369 – 0.234  | 0.660            | -0.083           | -0.385 – 0.219  | 0.591            | -0.082           | -0.383 – 0.218  | 0.591            |



|                                    | Baseline HRV     |                |          | HRV Reactivity   |                |          | HRV Recovery     |                |          |
|------------------------------------|------------------|----------------|----------|------------------|----------------|----------|------------------|----------------|----------|
|                                    | <i>Estimates</i> | <i>CI</i>      | <i>p</i> | <i>Estimates</i> | <i>CI</i>      | <i>p</i> | <i>Estimates</i> | <i>CI</i>      | <i>p</i> |
| Major Depressive Disorder          | -0.026           | -0.143 – 0.092 | 0.668    | -0.022           | -0.141 – 0.096 | 0.710    | -0.019           | -0.137 – 0.099 | 0.757    |
| Medication                         | -0.058           | -0.120 – 0.004 | 0.068    | -0.052           | -0.115 – 0.010 | 0.102    | -0.051           | -0.113 – 0.011 | 0.110    |
| <b>Random Effects</b>              |                  |                |          |                  |                |          |                  |                |          |
| $\sigma^2$                         |                  | 0.16           |          |                  | 0.16           |          |                  | 0.16           |          |
| $T_{00}$                           |                  | 0.39           |          |                  | 0.39           |          |                  | 0.39           |          |
| ICC                                |                  | 0.71           |          |                  | 0.72           |          |                  | 0.71           |          |
| N                                  |                  | 867            |          |                  | 854            |          |                  | 843            |          |
| Observations                       |                  | 1666           |          |                  | 1642           |          |                  | 1622           |          |
| Marginal $R^2$ / Conditional $R^2$ |                  | 0.188 / 0.764  |          |                  | 0.186 / 0.768  |          |                  | 0.184 / 0.765  |          |

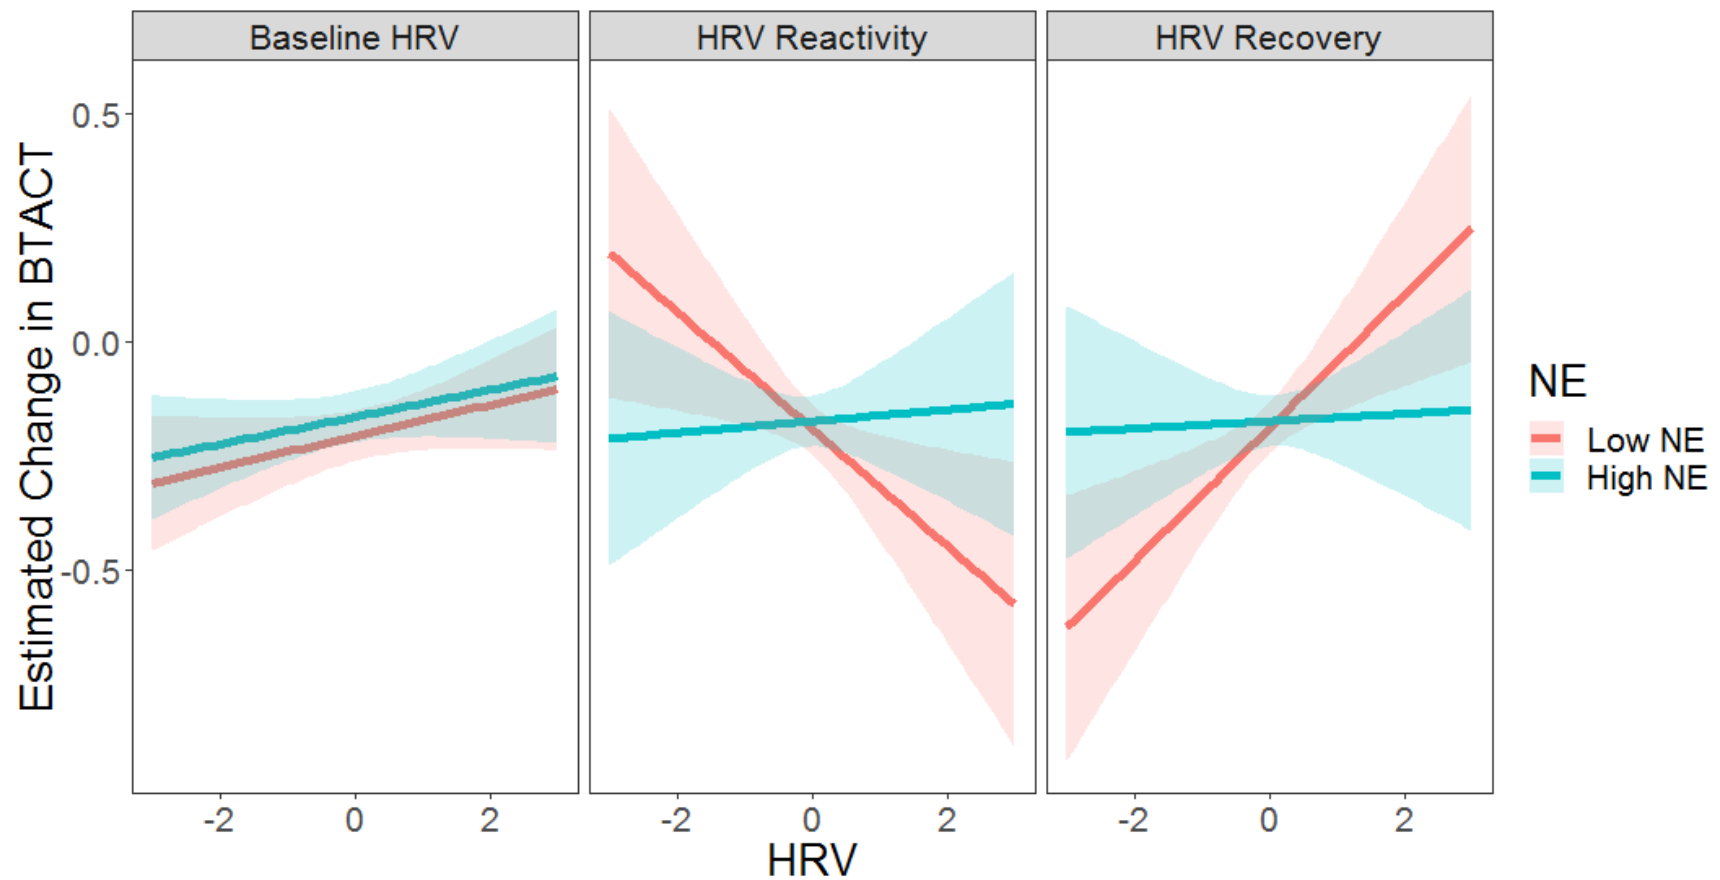

**Figure S2:** Estimated change in BTACT scores (MIDUS 3 – MIDUS 2) at  $\pm 1$ SD norepinephrine concentration across range of HF HRV values. Point estimates of change in BTACT represent the slope connecting MIDUS 2 to MIDUS 3 derived from the multilevel model. Larger HRV values for baseline and recovery represent stronger vagal tone; larger values for reactivity represent strong HRV withdrawal, indicative of weaker vagal tone.

Table S9: HF HRV reactivity to orthostatic challenge and EPI levels do not interactively predict change in cognitive functioning (BTACT scores)

|                                                      | <b>HF HRV Reactivity to Orthostatic Challenge</b> |                 |                  |
|------------------------------------------------------|---------------------------------------------------|-----------------|------------------|
|                                                      | <i>Estimates</i>                                  | <i>CI</i>       | <i>p</i>         |
| Intercept                                            | 2.048                                             | 1.501 – 2.595   | <b>&lt;0.001</b> |
| MIDUS Wave                                           | -0.196                                            | -0.251 – -0.141 | <b>&lt;0.001</b> |
| HF HRV (reactivity)                                  | 0.040                                             | -0.019 – 0.099  | 0.182            |
| EPI                                                  | -0.048                                            | -0.174 – 0.078  | 0.456            |
| Wave x EPI                                           | 0.077                                             | -0.020 – 0.174  | 0.119            |
| Wave x HF HRV                                        | -0.022                                            | -0.067 – 0.024  | 0.352            |
| HF HRV x EPI                                         | -0.012                                            | -0.120 – 0.095  | 0.822            |
| Wave x HF HRV x EPI                                  | 0.030                                             | -0.053 – 0.113  | 0.483            |
| <i>Covariates</i>                                    |                                                   |                 |                  |
| Age                                                  | -0.024                                            | -0.029 – -0.020 | <b>&lt;0.001</b> |
| Gender                                               | 0.028                                             | -0.069 – 0.126  | 0.568            |
| Years between Waves                                  | -0.177                                            | -0.235 – -0.119 | <b>&lt;0.001</b> |
| Circulatory                                          | -0.224                                            | -0.394 – -0.054 | <b>0.010</b>     |
| Heart Disease                                        | -0.088                                            | -0.271 – 0.096  | 0.349            |
| High BP                                              | -0.142                                            | -0.260 – -0.023 | <b>0.019</b>     |
| Heart Murmur                                         | 0.095                                             | -0.048 – 0.238  | 0.192            |
| TIA/Stroke                                           | -0.073                                            | -0.358 – 0.212  | 0.614            |
| Emphysema/COPD                                       | -0.073                                            | -0.376 – 0.230  | 0.638            |
| Major Depressive Disorder                            | -0.012                                            | -0.132 – 0.108  | 0.844            |
| Medication                                           | -0.049                                            | -0.112 – 0.014  | 0.128            |
| <b>Random Effects</b>                                |                                                   |                 |                  |
| $\sigma^2$                                           |                                                   | 0.16            |                  |
| $T_{00}$                                             |                                                   | 0.39            |                  |
| ICC                                                  |                                                   | 0.71            |                  |
| N                                                    |                                                   | 827             |                  |
| Observations                                         |                                                   | 1590            |                  |
| Marginal R <sup>2</sup> / Conditional R <sup>2</sup> |                                                   | 0.182 / 0.762   |                  |
